# Supplementary material for: The autonomic nervous system and cardiac GLP-1 receptors control heart rate in mice
Source: PubMed Central journal article supplement — Mol Metab. 2017 Sep 1;6(11):1339–49. doi: 10.1016/j.molmet.2017.08.010 (PMC5681270; doi:10.1016/j.molmet.2017.08.010), 2017-09-01
Supplement: mmc1.pdf [file mmc1.pdf]

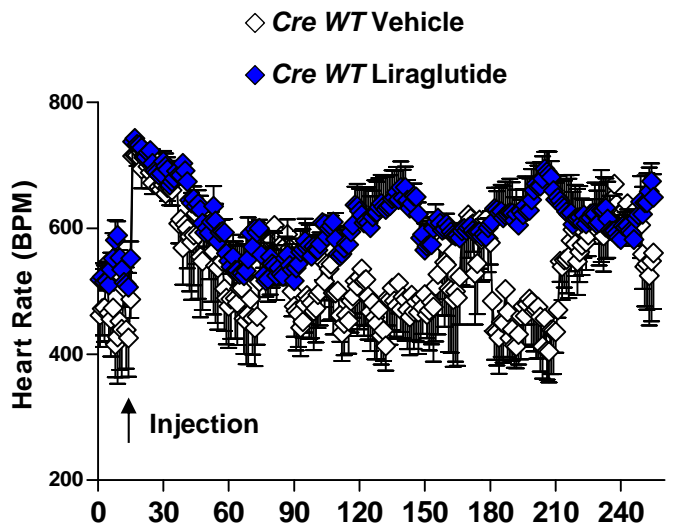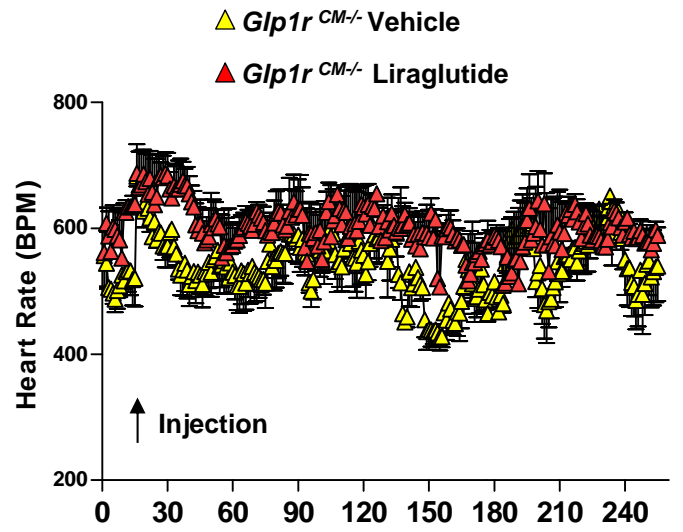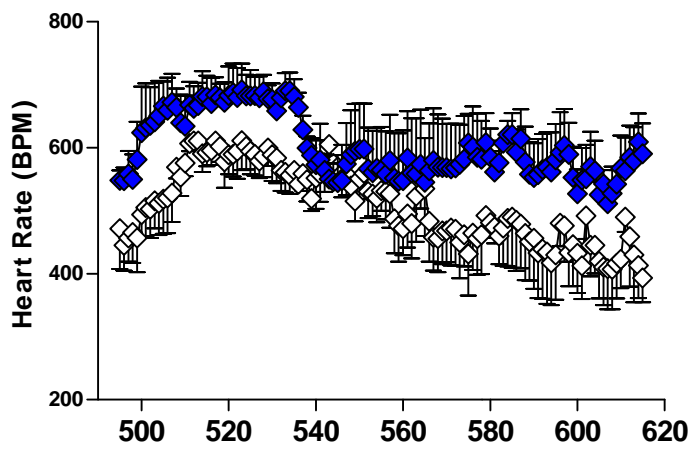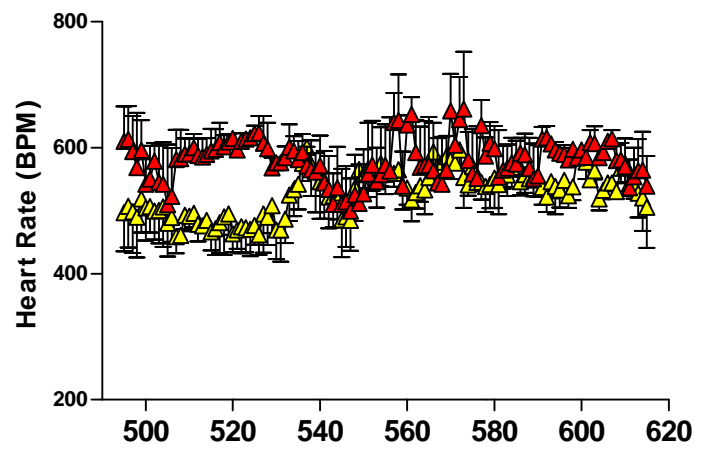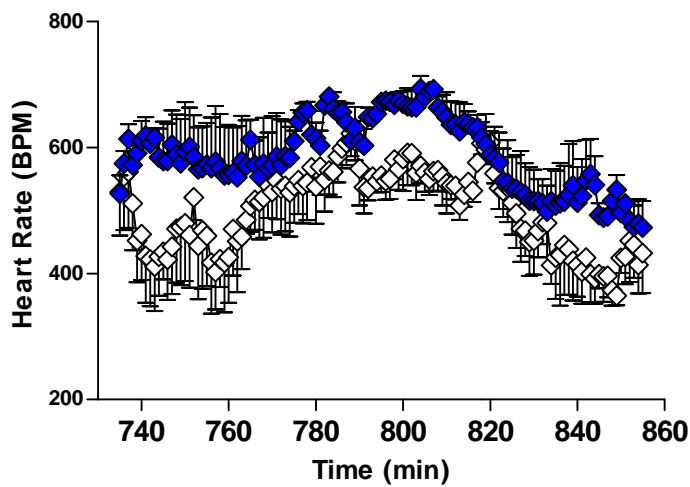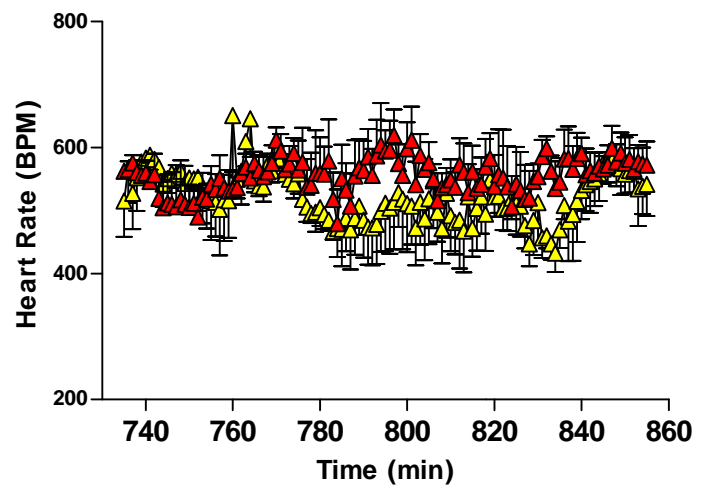

Sup. Figure 1

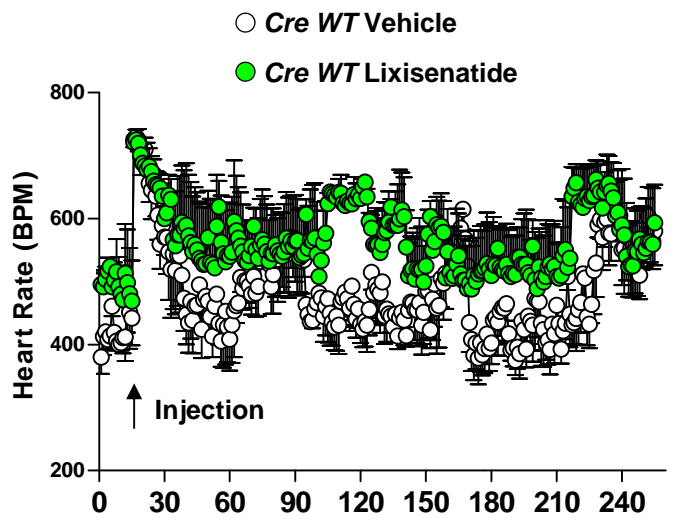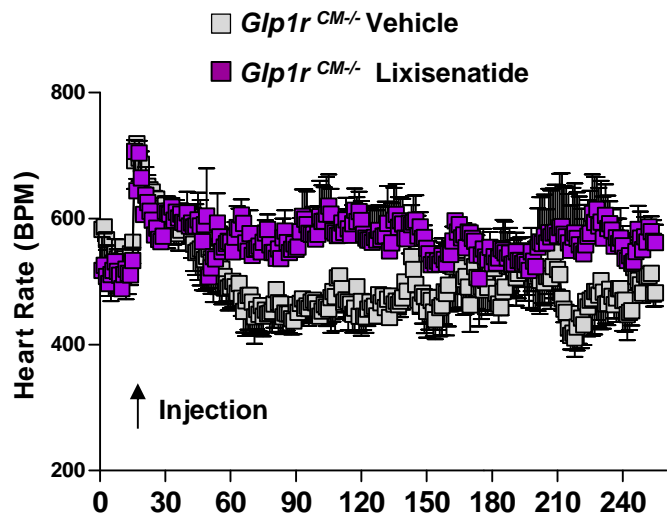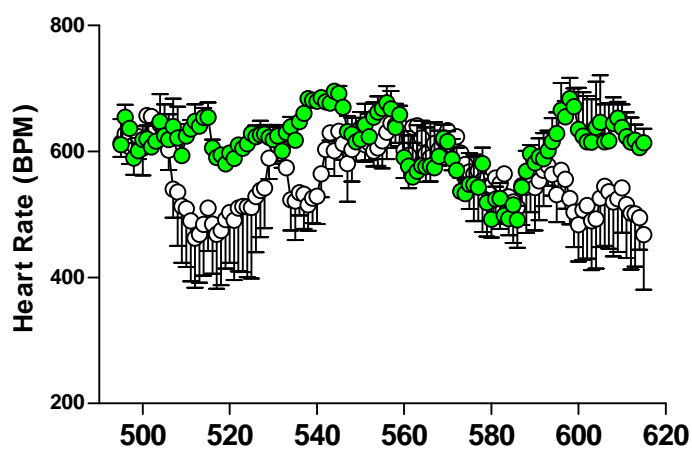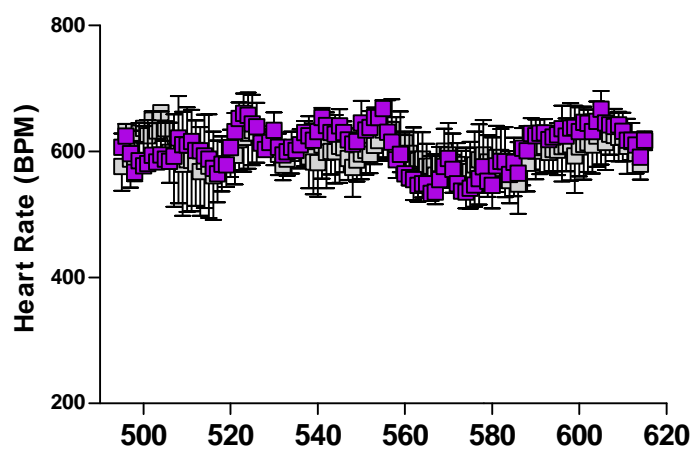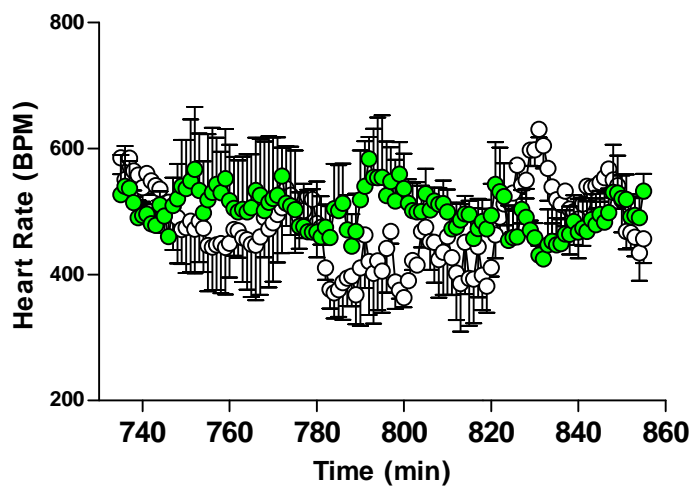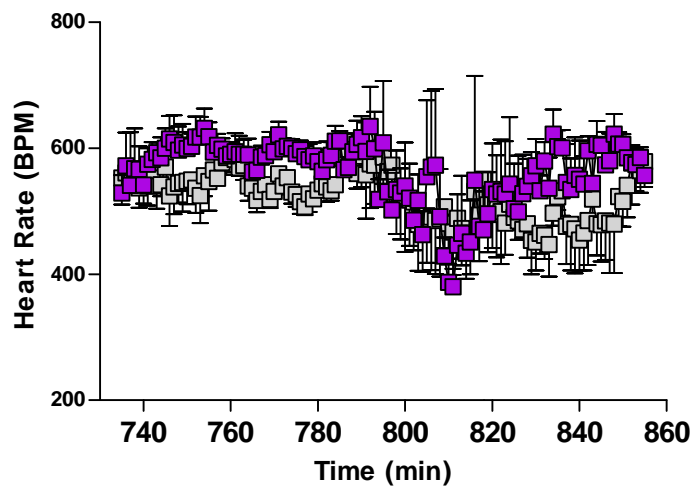

Sup. Figure 2

**Glp1r Genomic DNA:**

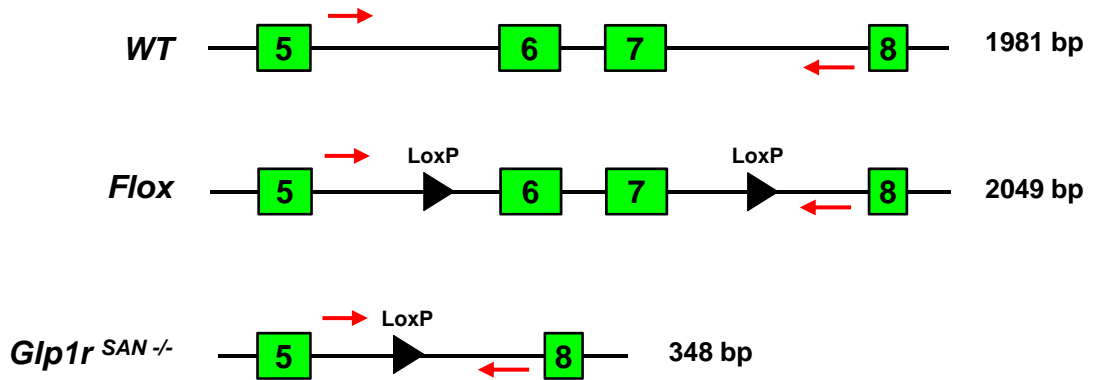

**Glp1r cDNA:**

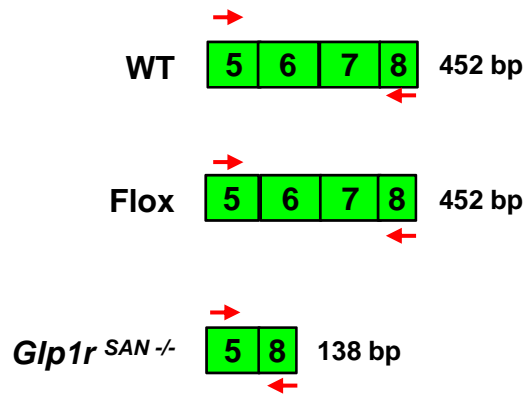

**Cre mRNA Expression Left Atrium**

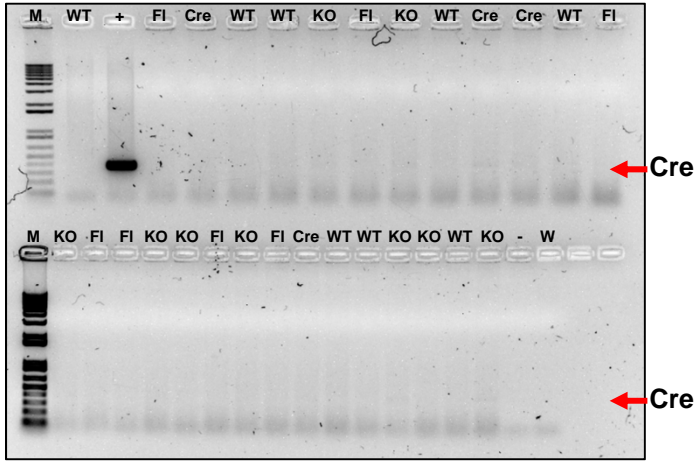

**Cre mRNA Expression Right Atrium**

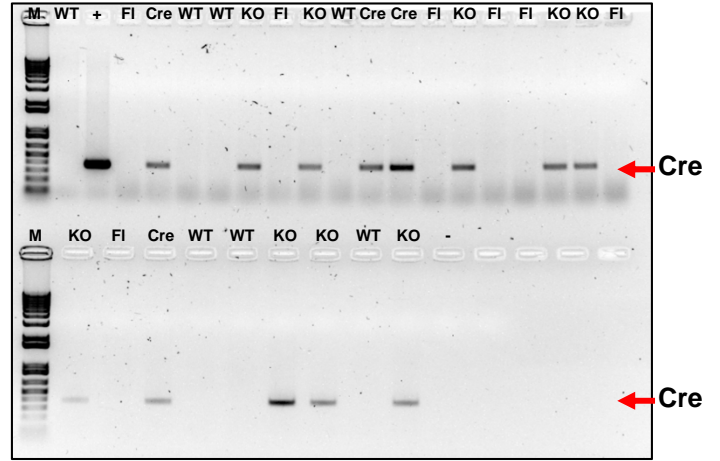

**Glp1r Exon 5-8 mRNA Expression Left Atrium**

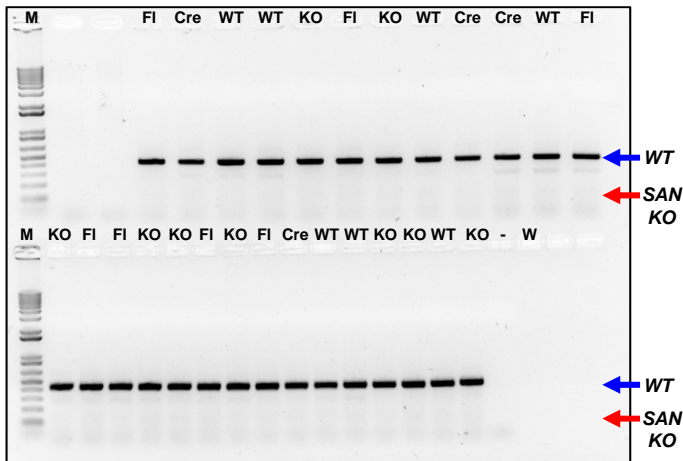

**Glp1r Exon 5-8 mRNA Expression Right Atrium**

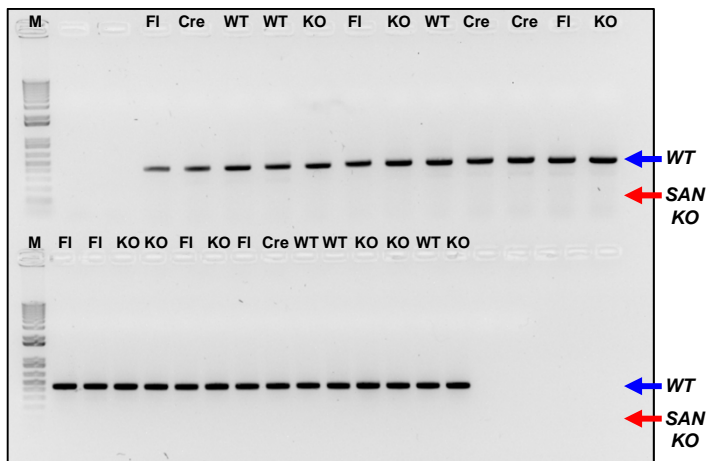

WT = 452 bp

*Glp1r*<sup>SAN<sup>-/-</sup></sup> (SAN KO) = 138 bp

**Left Atrium Genomic DNA**

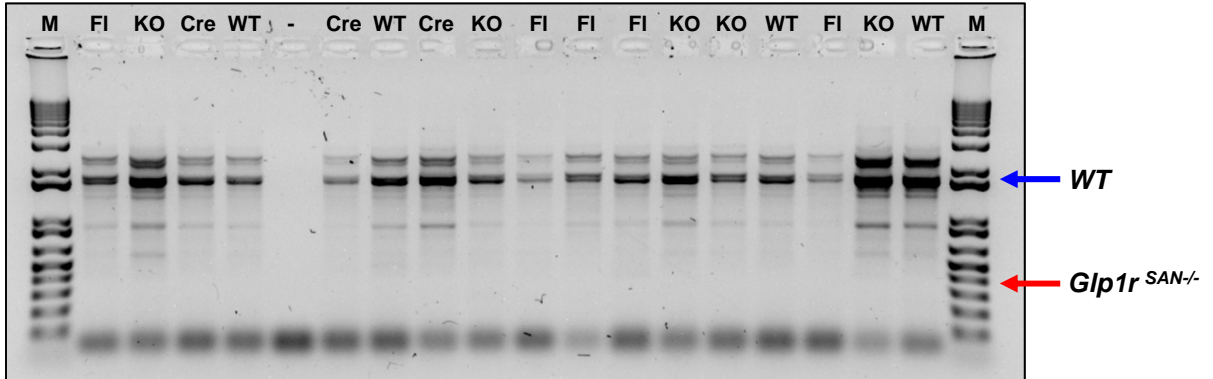

**Right Atrium Genomic DNA**

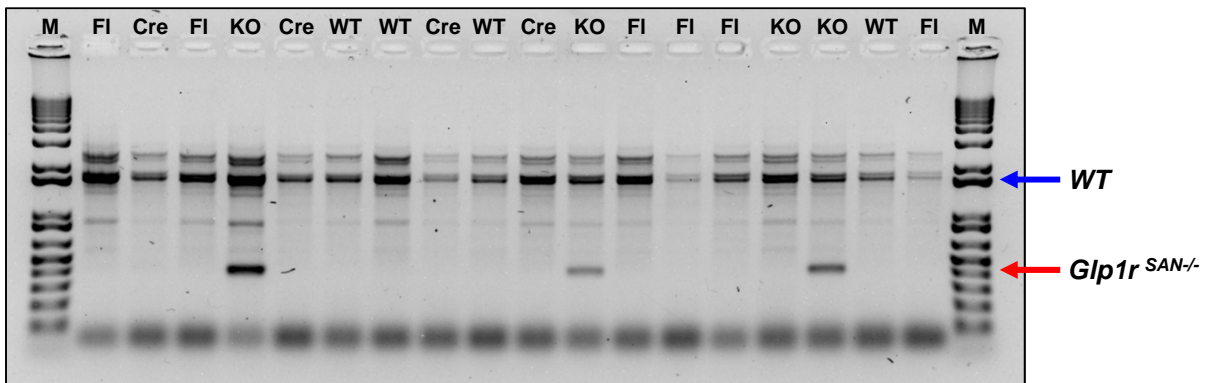

WT = 1981 bp

*Glp1r*<sup>SAN-/-</sup> = 348 bp

### Gcgr Genomic DNA

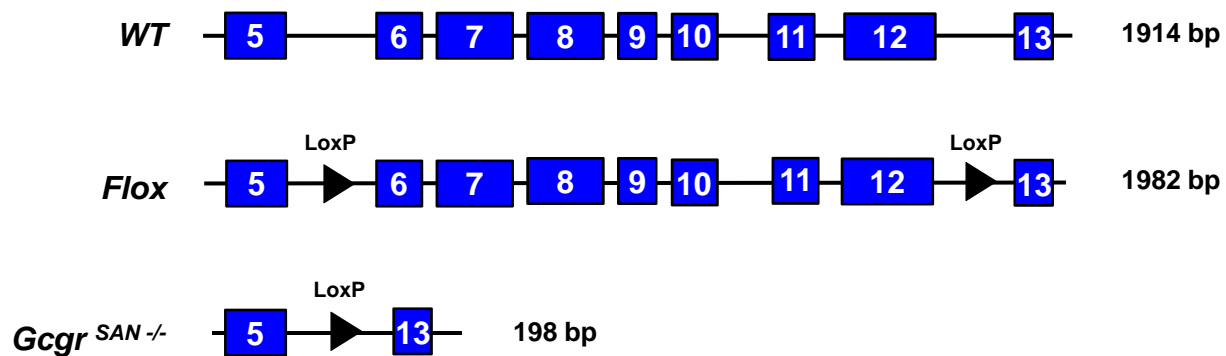

### Gcgr cDNA

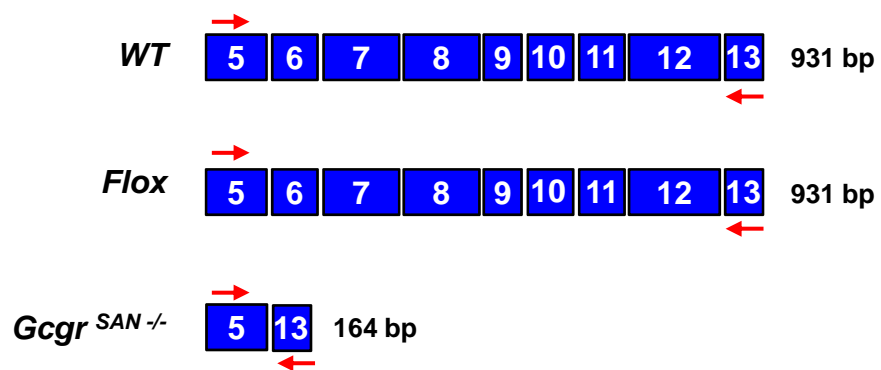

Cre mRNA Expression **Left Atrium**

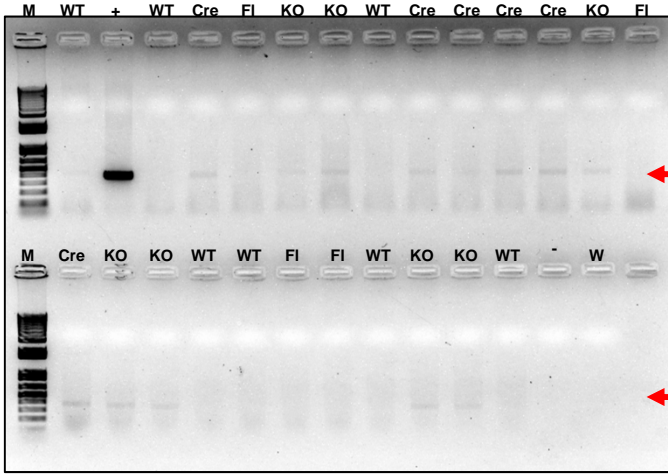

Cre mRNA Expression **Right Atrium**

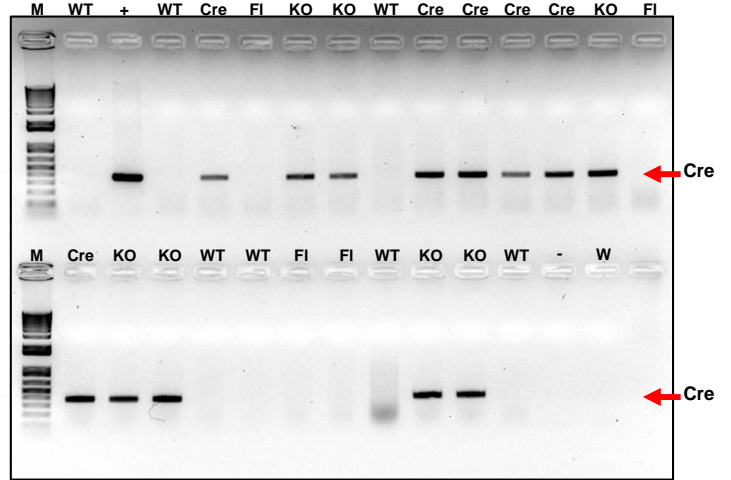

Gcgr Exon 5-13 mRNA Expression **Left Atrium**

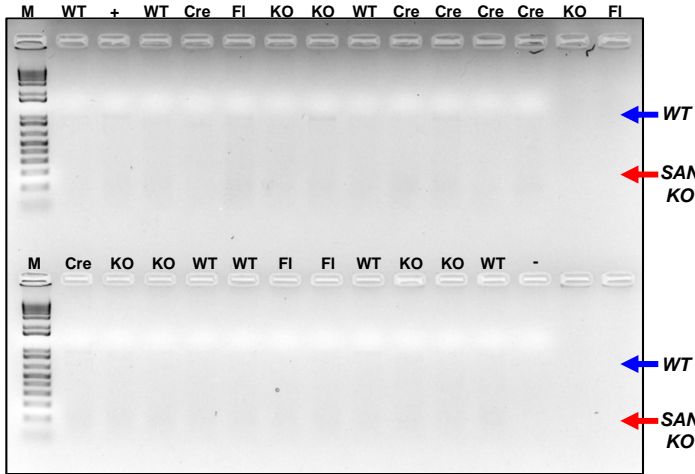

Gcgr Exon 5-13 mRNA Expression **Right Atrium**

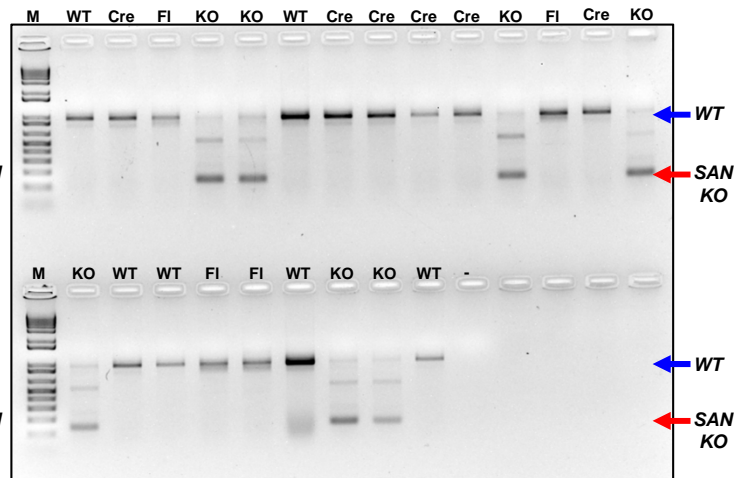

WT = 931 bp

*Gcgr*<sup>SAN<sup>-/-</sup></sup> (SAN KO) = 164 bp

**Supplementary Figure 1. Acute administration of liraglutide is associated with prolonged increases in heart rate in mice.** The graphs show minute-minute heart rate recordings of the data in Figures 2A and B. All injections were administered 15 min after the start of data collection. Values are mean  $\pm$  SE; n=3 mice/group.

**Supplementary Figure 2. Acute administration of lixisenatide is associated with short-term increases in heart rate in mice.** The graphs show minute-minute heart rate recordings following ip injection of vehicle or 10  $\mu$ g/kg lixisenatide in  $\alpha$ MHC-Cre (Cre WT) and *Glp1r*<sup>CM-/-</sup> mice. All injections were administered 15 min after the start of data collection. Values are mean  $\pm$  SE; n=3 mice/group.

**Supplementary Figure 3.** Schematic of *Glp1r* genomic DNA, cDNA, and expected PCR product sizes from wild-type (WT), *Fl/Fl Glp1r* (Flox), and sinoatrial node-specific *Glp1r* knockout mice (*Glp1r*<sup>SAN-/-</sup>). Arrows show positions of PCR primers.

**Supplementary Figure 4.** Agarose gels of PCR products generated by amplification of cDNA samples from the left atrium (left panels) and right atrium (right panels) from wild-type (WT), *Fl/Fl Glp1r* (FI), *Hcn4-Cre* (Cre) and sinoatrial node-specific *Glp1r* knockout (KO) mice. Upper panels are Cre PCR products (red arrow) and show that Cre is only expressed in the right atrium as would be expected for a sinoatrial node-specific Cre driver. Lower panels are PCR products from primers designed to amplify exons 5 to 8 of the *Glp1r*. In both the left and right atrium, only the full-length (452 bp) wild-type exon 5 to 8 product (blue arrow, WT) is amplified, suggesting that, although the *Glp1r* is expressed in the mouse atria, it is not expressed in HCN4-positive sinoatrial node cells. The predicted position of a truncated (138 bp) *Glp1r*<sup>SAN-/-</sup> exon 5 to 8 product is also shown (red arrow, SAN KO). M, molecular weight marker; +, positive control; -, negative control; w, water.

**Supplementary Figure 5.** Agarose gels of PCR products generated by amplification of *Glp1r* genomic DNA sequences flanking exons 6 to 7 of the *Glp1r* (see Supp. Fig. 3). Genomic DNA was isolated from the left and right atria of wild-type (WT), *Fl/Fl Glp1r* (FI), *Hcn4-Cre* (Cre) and sinoatrial node-specific *Glp1r* knockout (KO) mice. A full-length (1981 bp) product is amplified in all atrial genomic DNA samples (blue arrow, WT). Whereas a 348 bp truncated product, where exons 6 and 7 have been excised, is generated only from right atria genomic DNA from sinoatrial node-specific *Glp1r* knockout mice (red arrow, *Glp1r*<sup>SAN-/-</sup>), but not control mice. This data confirms that Cre recombinase is able to truncate the *Glp1r* genomic DNA sequence flanked by loxP sites in the right atrium and supports the notion that the *Glp1r* is expressed in the mouse atria, but is not expressed in HCN4-positive sinoatrial node cells. M, molecular weight marker.



**Supplementary Figure 6.** Schematic of *Gcgr* genomic DNA, cDNA, and expected PCR product sizes from wild-type (*WT*), *Fl/Fl Gcgr* (Flox), and sinoatrial node-specific *Gcgr* knockout (*Gcgr*<sup>SAN<sup>-/-</sup>) mice. Arrows show positions of PCR primers.</sup>

**Supplementary Figure 7.** Agarose gels of PCR products generated by amplification of cDNA samples from the left atrium (left panels) and right atrium (right panels) from wild-type (*WT*), *Fl/Fl Gcgr* (FI), *HCN4-Cre* (Cre) and sinoatrial node-specific *Gcgr* knockout (KO) mice. Upper panels are Cre PCR products (red arrows) and show that Cre is highly expressed in the right atrium as would be expected for a sinoatrial node-specific Cre driver. Lower panels are PCR products from primers designed to amplify exons 5 to 13 of the *Gcgr*. The *Gcgr* is not expressed in the left atrium. In the right atrium, the full-length (931 bp) exon 5 to 13 PCR product (blue arrow, WT) is amplified in all mice. Whereas a 164 bp truncated product, where exons 6 to 12 have been deleted, is amplified only in the sinoatrial node-specific *Gcgr* knockout mouse (red arrow, SAN KO). M, molecular weight marker; +, positive control; -, negative control; w, water.
